# Supplementary material for: Parameterization of particle formation rates in distinct atmospheric environments
Source: Copernicus journal article supplement (doi:10.5194/ar-2025-3), 2025-02-06
Supplement: Supplementary file 1 [file ar-2025-3-supplement.pdf]

1 **Supplements of**

2 **Parameterization of particle formation rates in distinct atmospheric environments**

3

4 **Xinyang Li et al.**

5

6 Correspondence to: xinyang Li ([xinyang.li@helsinki.fi](mailto:xinyang.li@helsinki.fi)) and Lubna Dada ([lubna.dada@helsinki.fi](mailto:lubna.dada@helsinki.fi))

7

8

9 **Contents of this file**

10

11 Tracer Model 5 Massively parallel version (TM5-MP)

12 Figures S1 to S4

13 Tables S1 to S7

14

15

16

17

## 18 **About Tracer Model 5 Massively Parallel version (TM5-MP)**

19 The global chemical transport model TM5-MP (Tracer Model 5, Massively Parallel version; using TM5 for short  
20 below; Williams et al., 2017; van Noije et al., 2021; Bergman et al., 2022) was applied to simulate the particle  
21 formation and growth in a global scale. The model is driven by the input meteorological datasets which are  
22 produced from ECMWF (European Centre for Medium-range Weather Forecasts) ERA5 reanalysis (Hersbach et  
23 al., 2020). In TM5, a detailed chemistry scheme including gas-phase, aqueous-phase and heterogeneous reactions  
24 are accounted for (more details refer to Williams et al., 2017 and van Noije et al., 2021). The aerosol dynamic  
25 processes are calculated with the two-moment modal model M7 (Vignati et al., 2004), which has seven log-  
26 normally distributed modes, including four water-soluble modes (nucleation, Aitken, accumulation and coarse) and  
27 three insoluble modes (Aitken, accumulation and coarse). The dry diameter range is less than 10 nm, 10 nm to 100  
28 nm, 100 nm to 1  $\mu\text{m}$ , and larger than 1  $\mu\text{m}$  for nucleation mode, Aitken mode, accumulation mode and coarse mode,  
29 respectively. The aerosol components in the current TM5 version contain SOA, sulfate, ammonium, nitrate,  
30 methane sulfonic acid (MSA), primary organic aerosol, black carbon, sea salt, and mineral dust (Bergman et al.,  
31 2022). More detailed description of TM5 can be found in van Noije et al. (2021) and Bergman (2022), and below  
32 we only present the part which is most related to this study.

33 The new particle formation occurs in the nucleation mode, and is calculated in four phases (Bergman et al., 2022).  
34 First, the binary homogeneous water-sulfuric acid scheme (Vehkamäki et al., 2002) is applied to calculate the  
35 formation rate of 1 nm particles. Secondly, the growth scheme proposed by Kerminen and Kulmala (2002) is used  
36 to calculate how many particles survive during the growth from 1 nm to 1.7 nm. Thirdly, the formation rate of  
37 additional 1.7 nm particles is calculated by the sulfuric acid-ELVOC parametrization method in Riccobono et al.  
38 (2014) (Ricco2014 in the following). Finally, the growth of particles from 1.7 nm to 5 nm is calculated with the  
39 same growth scheme in Kerminen and Kulmala (2002). The ELVOCs are produced from the oxidation of two  
40 precursors, isoprene and monoterpenes, by OH and O<sub>3</sub> in the air. The sources of these two precursors are natural  
41 emissions calculated by MEGANv2.1 (Model of Emissions of Gases and Aerosols from Nature version 2.1;  
42 Guenther et al., 2012; Sindelarova et al., 2014) and biomass burning emissions based on van Marle et al. (2017).  
43 In our sensitivity experiments, we assess the sensitivity of simulated aerosol size distributions to underlying  
44 nucleation scheme by replacing Ricco2014 by the four parameterizations (Eqs. 2-5). In addition, we run TM5  
45 without any nucleation mechanism to quantify impact of nucleation. For each nucleation mechanism we perform  
46 global simulation with 2018 meteorological data. Resulting aerosol size distributions are evaluated against data  
47 retrieved from ACTRIS.

48

49

50

51

52 **Figures:**

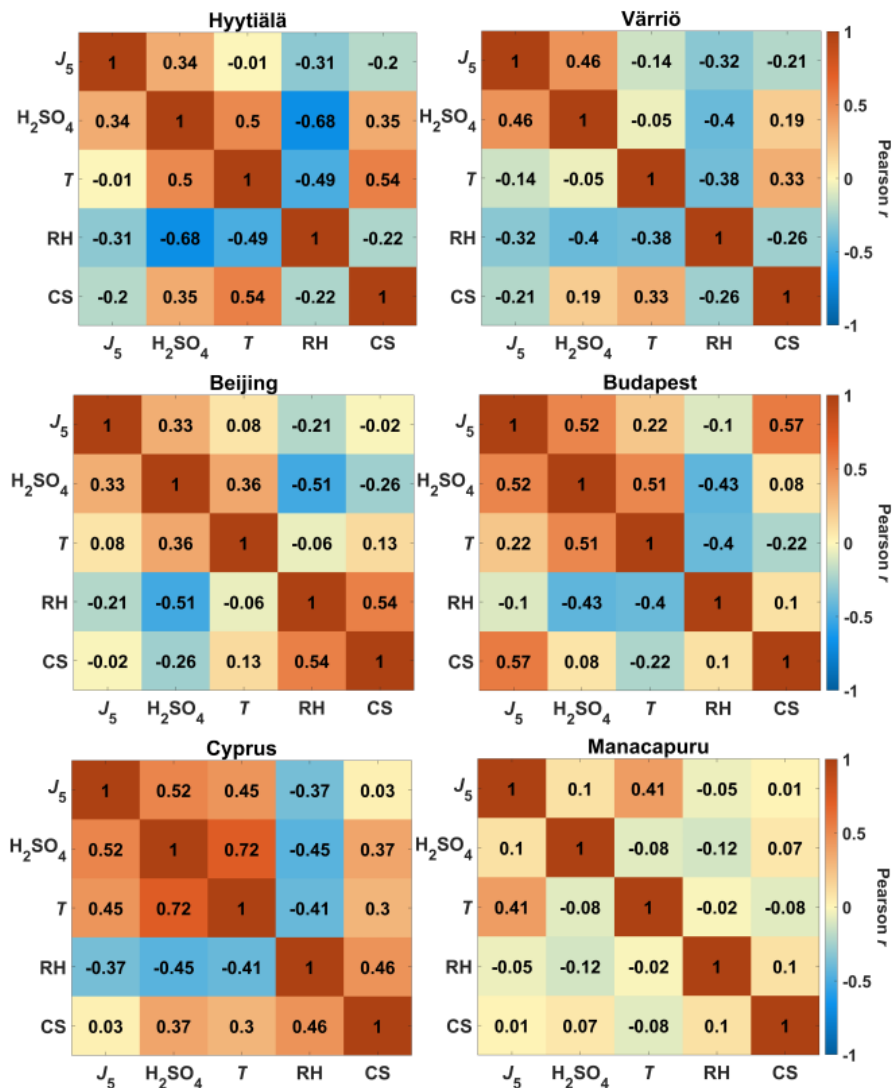

53

54 Figure S1. Heatmaps of variables for six measurement sites. The numbers shown in each block were Pearson  
 55 correlation coefficients, and the color bars on the right side of each row represented the scale of the coefficients.  
 56 Particle formation rate at 5 nm ( $J_5$ ) is in  $\text{cm}^{-3} \text{s}^{-1}$ .  $H_2SO_4$  is measured sulfuric acid concentrations in  $\text{cm}^{-3}$ .  $T$  is the  
 57 ambient temperature in  $^{\circ}\text{C}$ . Relative humidity ( $RH$ ) is in %. Condensation sink ( $CS$ ) is in  $\text{s}^{-1}$ .  $CS$  is not corrected  
 58 for hygroscopic growth, since the correction factors were only developed for the boreal forest environment  
 59 Hyytiälä, and they are not applicable for other sites.

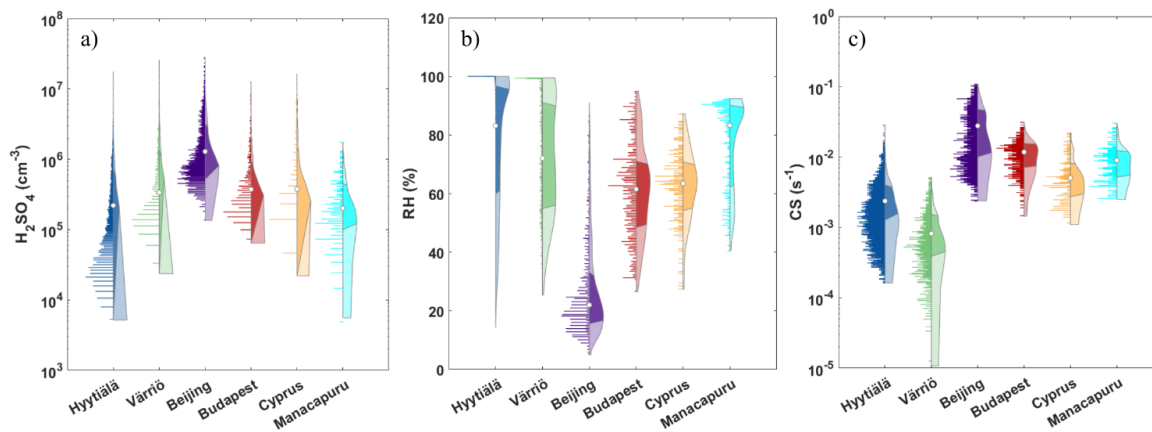

60

61 Figure S2. Violin and data distribution plots of input variables a)  $\text{H}_2\text{SO}_4$  concentrations, b) relative humidity (RH)  
 62 and c) condensation sink (CS) for each site. The white dots at the center of the violin plots represent the median  
 63 values of the variable for the corresponding site. The shaded areas on the right side of each violin box cover the  
 64 entire data distribution, as well as their 25<sup>th</sup> and 75<sup>th</sup> percentiles marked by the darker color of the box. The left side  
 65 of the violin box shows the histograms of the variables.

66

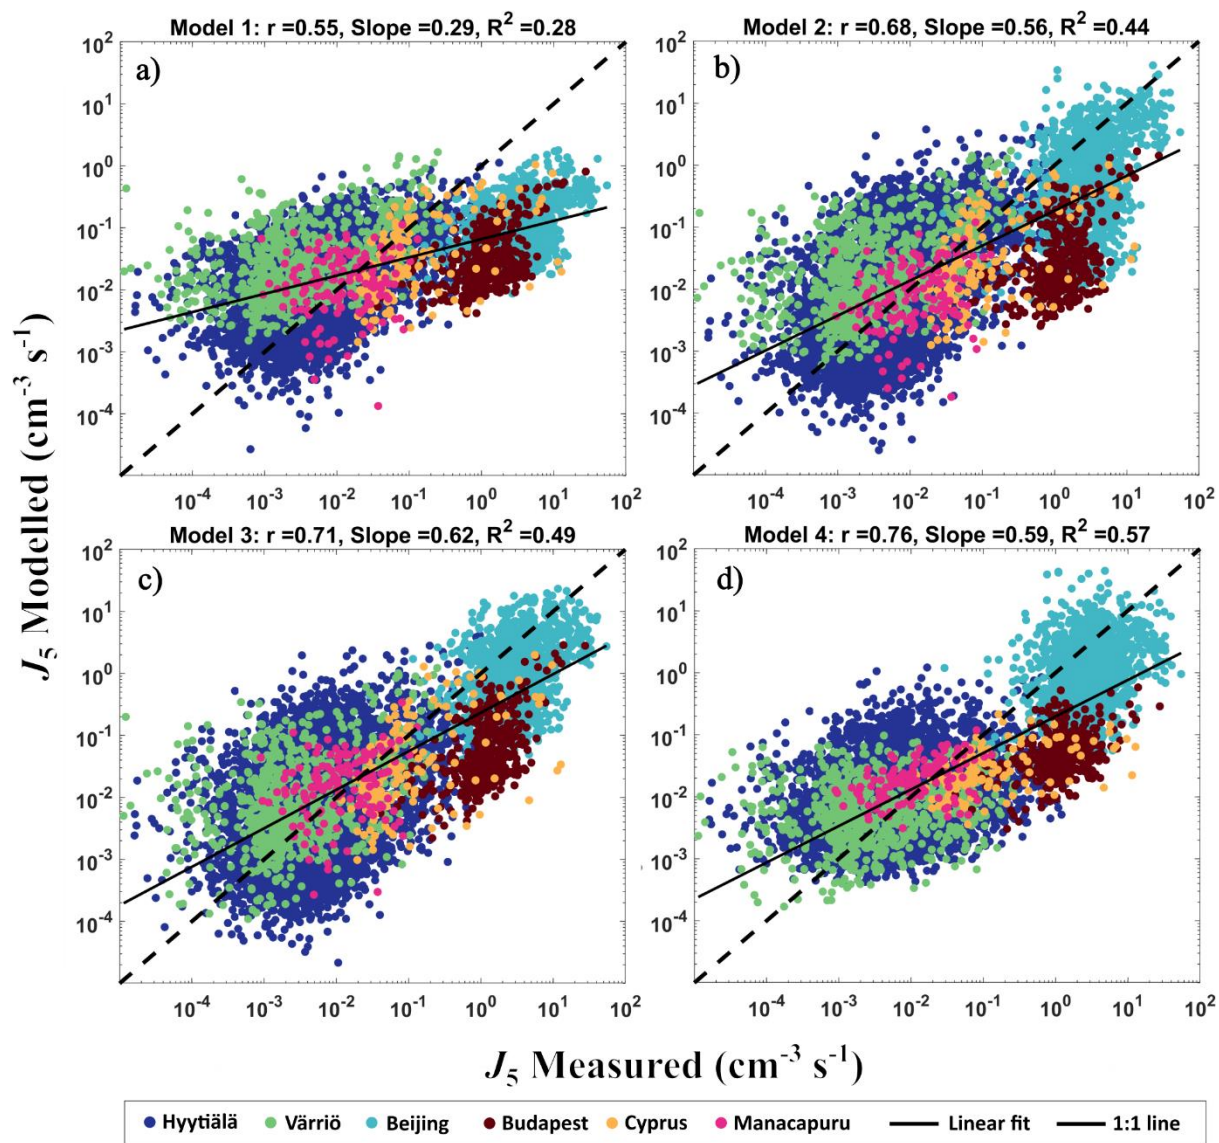

67  
 68 Figure S3. Modelled and measured  $J_5$  scatterplots in logscale from four models using the training dataset containing  
 69 data from all sites in hourly time resolution. Each color represents the data from one measurement site. The straight  
 70 line showed the robust linear fit between the logscale modelled and the measure  $J_5$  values, and the dashed line  
 71 represented the 1:1 line. The correlation coefficient  $r$ , slope of linear fit, and the coefficient of determination  $R^2$  are  
 72 shown in the title of each subplot.

73

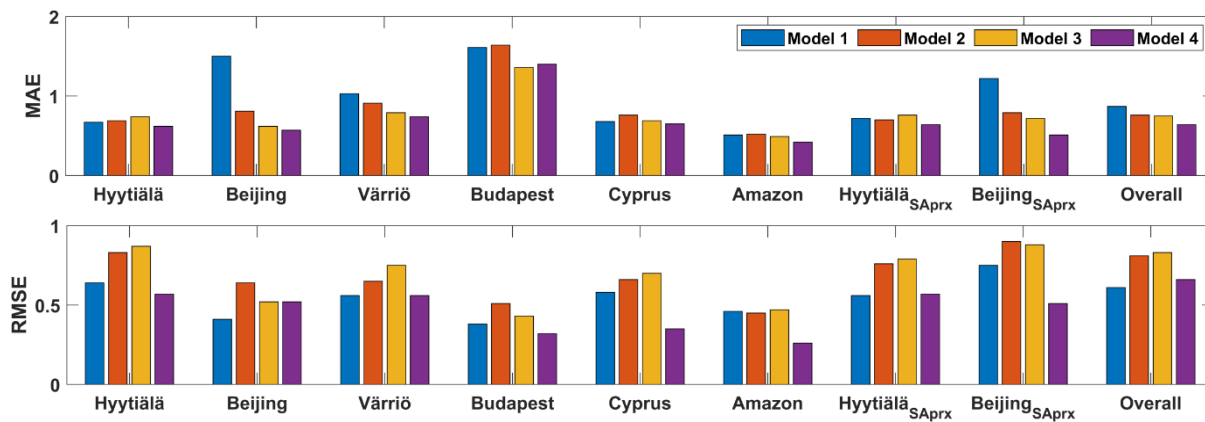

74

75 Figure S4. Summary of the mean absolute errors (MAE, upper panel) and the root mean absolute errors (RMSE,  
 76 lower panel) from four models using testing dataset. The MAE and RMSE values were calculated between the  
 77 logarithmic values modelled and measured  $J_5$ .

78

79 **Tables:**

80 Table S1. Summary of measurement sites and the instrumentations details for the measured variables. All the data  
 81 were adjusted into local time for each measurement site.

| Location            | Type                                                                        | Measurement Period             | Particle Size Distribution                                                                                                               | Trace Gases                                                                   | Temperature ( <i>T</i> ) and relative humidity (RH)                                  |
|---------------------|-----------------------------------------------------------------------------|--------------------------------|------------------------------------------------------------------------------------------------------------------------------------------|-------------------------------------------------------------------------------|--------------------------------------------------------------------------------------|
| Hyytiälä, Finland   | Boreal forest (rural environment, biogenic emissions)                       | 21 March 2016 – 18 August 2019 | Twin-DMPS; ground level                                                                                                                  | H <sub>2</sub> SO <sub>4</sub> (CI-API-ToF); 35m a.g.l.                       | <i>T</i> : Pt100 inside custom shield, 16.8 m; RH: Rotronic MP102H RH sensor, 16.8 m |
| Beijing, China      | Megacity (polluted, anthropogenic emissions)                                | 29 May 2018 – 3 April 2019     | 3 – 10,000 nm, PSD system: a nano-DMA (3085, TSI), a long DMA (3081, TSI) and an Aerodynamic Particle Sizer (APS, TSI 3321); 12 m a.g.l. | H <sub>2</sub> SO <sub>4</sub> (API-LToF-CIMS, model: Aerodyne); ~12 m a.g.l. | <i>T</i> , RH: Automatic Weather Station, model: AWS310, Vaisala Ltd.                |
| Värriö, Finland     | Boreal forest (cleaner rural environment than Hyytiälä, biogenic emissions) | 5 April – 13 August 2019       | DMPS with CPC (TSI 3776); ground level                                                                                                   | H <sub>2</sub> SO <sub>4</sub> (CI-API-ToF)                                   | <i>T</i> : PT-100 Rotronic MP106A, 2 m; RH: capacitive sensor, Rotronic MP106A, 2 m  |
| Budapest, Hungary   | City center (anthropogenic emissions)                                       | 22 March – 17 April 2018       | 6-1000 nm using flow-switching type DMPS                                                                                                 | H <sub>2</sub> SO <sub>4</sub> (CI-API-ToF)                                   | <i>T</i> , RH: BpART Lab                                                             |
| Agia Marina, Cyprus | Rural background (biogenic and anthropogenic emissions)                     | 22 February – 4 March 2018     | 2-20 nm using Airel NAIS and 20-800 nm using TSI SMPS                                                                                    | H <sub>2</sub> SO <sub>4</sub> (CI-API-ToF)                                   | <i>T</i> , RH: meteorological stations                                               |

|                       |                                            |                               |                                                                                      |                                            |                                                                                                                              |
|-----------------------|--------------------------------------------|-------------------------------|--------------------------------------------------------------------------------------|--------------------------------------------|------------------------------------------------------------------------------------------------------------------------------|
| Manacapuru,<br>Brazil | Amazonian<br>basin (biogenic<br>emissions) | 22 August – 9<br>October 2014 | IOP1: SMPS<br>(TSI model<br>3963); IOP2:<br>CPC (TSI model<br>3772). (ARM,<br>2014c) | H <sub>2</sub> SO <sub>4</sub><br>(SICIMS) | <i>T</i> , RH:<br>Atmospheric<br>Radiation<br>Measurement<br>(ARM) user<br>facility,<br>precision<br>spectral<br>pyranometer |
|-----------------------|--------------------------------------------|-------------------------------|--------------------------------------------------------------------------------------|--------------------------------------------|------------------------------------------------------------------------------------------------------------------------------|

---

82  
83  
84



85 Table S2. Summary of the mean, median, 5<sup>th</sup>-95<sup>th</sup> percentiles and standard deviation (SD) of sulfuric acid  
 86 concentrations (H<sub>2</sub>SO<sub>4</sub>), relative humidity (RH), and condensation sink (CS) at all locations and time periods  
 87 included in this study.

| Locations                                                                                | Hyytiälä,<br>Finland                 | Beijing,<br>China                | Värriö,<br>Finland             | Budapest,<br>Hungary           | Agia<br>Marina,<br>Cyprus        | Manacapuru,<br>Brazil                 |       |
|------------------------------------------------------------------------------------------|--------------------------------------|----------------------------------|--------------------------------|--------------------------------|----------------------------------|---------------------------------------|-------|
| Environment types                                                                        | Rural boreal<br>forest               | Mega-city                        | Remote<br>boreal<br>forest     | Urban<br>backgroun<br>d        | Rural                            | Amazon<br>basin                       |       |
| Measurement period                                                                       | 21 March<br>2016 – 18<br>August 2019 | 29 May<br>2018 – 3<br>April 2019 | 5 April –<br>13 August<br>2019 | 22 March –<br>17 April<br>2018 | 22 February<br>– 4 March<br>2018 | 22 August<br>2014 – 9<br>October 2014 |       |
| <i>H</i> <sub>2</sub> <i>S</i> O <sub>4</sub><br><br>(10 <sup>5</sup> cm <sup>-3</sup> ) | mean                                 | 5.96                             | 23.52                          | 11.7                           | 8.27                             | 13.16                                 | 3.18  |
|                                                                                          | median                               | 2.55                             | 12.43                          | 3.37                           | 3.74                             | 3.76                                  | 2.04  |
|                                                                                          | 5 <sup>th</sup> percentile           | 0.27                             | 3.64                           | 0.69                           | 1.19                             | 0.58                                  | 0.4   |
|                                                                                          | 95 <sup>th</sup> percentile          | 21.52                            | 68.6                           | 43.97                          | 28.56                            | 62.67                                 | 10.13 |
|                                                                                          | SD                                   | 9.96                             | 27.88                          | 25.17                          | 13.15                            | 22                                    | 3.02  |
| <i>T</i><br><br>(°C)                                                                     | mean                                 | 7.2                              | 8.8                            | 4.5                            | 11.8                             | 14                                    | 26.8  |
|                                                                                          | median                               | 9.1                              | 7.5                            | 4.5                            | 11                               | 13.2                                  | 25.6  |
|                                                                                          | 5 <sup>th</sup> percentile           | -10                              | -5.5                           | -5.2                           | 1.9                              | 11.6                                  | 23.2  |
|                                                                                          | 95 <sup>th</sup> percentile          | 22                               | 30                             | 13.2                           | 21.7                             | 18                                    | 32.3  |
| <i>RH</i><br><br>(%)                                                                     | SD                                   | 10.2                             | 10.8                           | 5.6                            | 5.9                              | 2.3                                   | 3.2   |
|                                                                                          | mean                                 | 75                               | 27                             | 72                             | 61                               | 63                                    | 78    |
|                                                                                          | median                               | 81                               | 22                             | 72                             | 62                               | 63                                    | 85    |
|                                                                                          | 5 <sup>th</sup> percentile           | 35                               | 11                             | 40                             | 35                               | 42                                    | 51    |
| <i>CS</i><br><br>(10 <sup>-3</sup> s <sup>-1</sup> )                                     | 95 <sup>th</sup> percentile          | 100                              | 65                             | 99                             | 88                               | 82                                    | 92    |
|                                                                                          | SD                                   | 22                               | 16                             | 19                             | 16                               | 12                                    | 15    |
|                                                                                          | mean                                 | 3.02                             | 32.12                          | 1.07                           | 11.82                            | 6.33                                  | 9.7   |
|                                                                                          | median                               | 2.42                             | 28.25                          | 0.82                           | 11.82                            | 5.07                                  | 8.94  |
| <i>CS</i><br><br>(10 <sup>-3</sup> s <sup>-1</sup> )                                     | 5 <sup>th</sup> percentile           | 0.49                             | 5.27                           | 0.14                           | 4.17                             | 1.77                                  | 3.18  |
|                                                                                          | 95 <sup>th</sup> percentile          | 7.52                             | 77.03                          | 2.95                           | 21.12                            | 15.35                                 | 22.25 |
|                                                                                          | SD                                   | 2.37                             | 23.22                          | 0.88                           | 5.32                             | 4.61                                  | 5.47  |

89 Table S3. Summary of mean absolute errors (MAE) and root mean squared errors (RMSE) from four models using  
90 testing set. The RMSE values were calculated using logarithmic scale from the predicted and measured  $J_5$ , and the  
91 number in brackets under the name of each site represents the count for data points. The unit of MAE and RMSE  
92 is the same as particle formation rate ( $J$ ), and the magnitude of MAE and RMSE indicates the fitting level between  
93 the predicted and measured  $J_5$  values. The higher MAE or RMSE represents that the model is under great influence  
94 from large prediction errors, which cause the over-/under-fitting of data and vice versa.

|        |   | Mean Absolute Error (MAE) and Root Mean Square Error (RMSE), logscale |                  |                 |                   |                |                    |                                 |                                |         |
|--------|---|-----------------------------------------------------------------------|------------------|-----------------|-------------------|----------------|--------------------|---------------------------------|--------------------------------|---------|
| Models |   | Hyytiälä<br>(1642)                                                    | Beijing<br>(501) | Värriö<br>(248) | Budapest<br>(109) | Cyprus<br>(34) | Manacapuru<br>(40) | Hyytiälä <sub>SA</sub><br>(797) | Beijing <sub>SA</sub><br>(164) | Overall |
| MAE    | 1 | 0.67                                                                  | 1.50             | 1.03            | 1.61              | 0.68           | 0.51               | 0.72                            | 1.22                           | 0.87    |
|        | 2 | 0.69                                                                  | 0.81             | 0.91            | 1.64              | 0.76           | 0.52               | 0.70                            | 0.79                           | 0.76    |
|        | 3 | 0.74                                                                  | 0.62             | 0.79            | 1.36              | 0.69           | 0.49               | 0.76                            | 0.72                           | 0.75    |
|        | 4 | 0.62                                                                  | 0.57             | 0.74            | 1.40              | 0.65           | 0.42               | 0.64                            | 0.51                           | 0.64    |
| RMSE   | 1 | 0.64                                                                  | 0.41             | 0.56            | 0.38              | 0.58           | 0.46               | 0.56                            | 0.75                           | 0.61    |
|        | 2 | 0.83                                                                  | 0.64             | 0.65            | 0.51              | 0.66           | 0.45               | 0.76                            | 0.90                           | 0.81    |
|        | 3 | 0.87                                                                  | 0.52             | 0.75            | 0.43              | 0.70           | 0.47               | 0.79                            | 0.88                           | 0.83    |
|        | 4 | 0.57                                                                  | 0.52             | 0.56            | 0.32              | 0.35           | 0.26               | 0.57                            | 0.51                           | 0.66    |

95

96 Table S4. Table of statistical parameters utilized to derive the Akaike Information Criterion (AIC) for boreal forests,  
97 Hyytiälä and Värriö. Model and equation numbers correspond to those in the main text (see Section 3).  $N_{\text{train}}$   
98 represents the sample size of training set, and  $N_{\text{test}}$  for the testing set (Table 1).  $X$  denotes the counts for coefficient  
99 numbers. The correlation coefficient ( $r$ ), slope, root mean square error (RMSE) and sum of squared error ( $SSe$ )  
100 were calculated based on a robust linear fit between the predicted and measured  $J_5$  using the training set in  
101 logarithmic scale. AIC is calculated as  $AIC = 2X + N_{\text{test}} \ln(SSe)$ . The relative likelihood term  $L$  ( $L = e^{(AIC_{\text{min}} - AIC_i)/2}$ )  
102 indicates the likelihood of the  $i$ th model minimizing information loss. For example, for Hyytiälä, model 3 (Eq. 4)  
103 is approximately 3.26E-303 times more probable than model 4 (Eq. 5) in minimizing the information loss.

### Boreal forests

| Total Training dataset |  |         |         |         |         |
|------------------------|--|---------|---------|---------|---------|
| number                 |  |         |         | 10294   |         |
| Model number           |  | 1       | 2       | 3       | 4       |
| $X$                    |  | 1       | 2       | 3       | 4       |
| Hyytiälä               |  |         |         |         |         |
| $N_{\text{train}}$     |  |         |         | 5003    |         |
| $N_{\text{test}}$      |  |         |         | 1642    |         |
| $r$                    |  | 0.43    | 0.47    | 0.37    | 0.31    |
| Slope                  |  | 0.43    | 0.62    | 0.48    | 0.25    |
| RMSE                   |  | 0.64    | 0.83    | 0.87    | 0.57    |
| $SSe$                  |  | 681.59  | 1125.79 | 1244.48 | 532.13  |
| AIC                    |  | 10715.1 | 11541.1 | 11707.7 | 10314.7 |

|                                 |          |           |           |         |
|---------------------------------|----------|-----------|-----------|---------|
| $L$                             | 1.11E-87 | 4.84E-267 | 3.26E-303 | 1       |
| <b>Hyytiälä<sub>SAprx</sub></b> |          |           |           |         |
| $N_{\text{train}}$              |          |           | -         |         |
| $N_{\text{test}}$               |          |           | 797       |         |
| $r$                             | 0.41     | 0.48      | 0.36      | 0.33    |
| Slope                           | 0.34     | 0.57      | 0.42      | 0.28    |
| RMSE                            | 0.56     | 0.76      | 0.79      | 0.57    |
| $SSe$                           | 250.9    | 463.5     | 494.0     | 259.0   |
| AIC                             | 4405.4   | 4896.7    | 4949.5    | 4436.7  |
| $L$                             | 1        | 2.05E-107 | 7.07E-119 | 1.5E-07 |
| <b>Värriö</b>                   |          |           |           |         |
| $N_{\text{train}}$              |          |           | 728       |         |
| $N_{\text{test}}$               |          |           | 248       |         |
| $r$                             | 0.44     | 0.47      | 0.35      | 0.18    |
| Slope                           | 0.32     | 0.40      | 0.32      | 0.12    |
| RMSE                            | 0.56     | 0.65      | 0.75      | 0.56    |
| $SSe$                           | 76.1     | 104.3     | 137.3     | 76.8    |
| AIC                             | 1076.2   | 1156.4    | 1226.6    | 1084.6  |
| $L$                             | 1        | 3.84E-18  | 2.17E-33  | 0.015   |

104

105 Table S5. Table of statistical parameters utilized to derive the Akaike Information Criterion (AIC) for urban  
106 environments, Beijing and Budapest. Model and equation numbers correspond to those in the main text (see Section  
107 3).  $N_{\text{train}}$  represents the sample size of training set, and  $N_{\text{test}}$  for the testing set (Table 1).  $X$  denotes the counts for  
108 coefficient numbers. The correlation coefficient ( $r$ ), slope, root mean square error (RMSE) and sum of squared  
109 error ( $SSe$ ) were calculated based on a robust linear fit between the predicted and measured  $J_5$  using the training  
110 set in logarithmic scale. AIC is calculated as  $AIC = 2X + N_{\text{test}} \ln(SSe)$ . The relative likelihood term  $L$  ( $L = e^{(AIC_{\text{min}} -$   
111  $AIC_i)/2}$ ) indicates the likelihood of the  $i$ th model minimizing information loss. For example, for Beijing, model 4  
112 (Eq. 5) is approximately  $3.10E-53$  times more probable than model 1 (Eq. 2) in minimizing the information loss.

### Urban

|                        |      |      |       |      |
|------------------------|------|------|-------|------|
| Total Training dataset |      |      |       |      |
| number                 |      |      | 10294 |      |
| Model number           | 1    | 2    | 3     | 4    |
| $X$                    | 1    | 2    | 3     | 4    |
| <b>Beijing</b>         |      |      |       |      |
| $N_{\text{train}}$     |      |      | 1342  |      |
| $N_{\text{test}}$      |      |      | 501   |      |
| $r$                    | 0.30 | 0.32 | 0.30  | 0.22 |
| Slope                  | 0.33 | 0.57 | 0.43  | 0.28 |
| RMSE                   | 0.41 | 0.64 | 0.52  | 0.52 |

|                                |           |           |           |          |
|--------------------------------|-----------|-----------|-----------|----------|
| <i>SSe</i>                     | 83.7      | 205.7     | 133.5     | 134.0    |
| AIC                            | 2220.0    | 2672.6    | 2458.0    | 2461.8   |
| <i>L</i>                       | 1         | 5.08E-99  | 2.01E-52  | 3.10E-53 |
| <b>Beijing<sub>SAprx</sub></b> |           |           |           |          |
| $N_{\text{train}}$             |           | -         |           |          |
| $N_{\text{test}}$              |           | 164       |           |          |
| <i>r</i>                       | 0.004     | 0.07      | 0.02      | 0.09     |
| Slope                          | 0.07      | 0.23      | 0.12      | 0.12     |
| RMSE                           | 0.75      | 0.90      | 0.88      | 0.51     |
| <i>SSe</i>                     | 92.0      | 130.3     | 125.1     | 42.2     |
| AIC                            | 3605.8    | 3885.1    | 3854.5    | 2991.2   |
| <i>L</i>                       | 3.42E-134 | 7.67E-195 | 3.36E-188 | 1        |
| <b>Budapest</b>                |           |           |           |          |
| $N_{\text{train}}$             |           | 367       |           |          |
| $N_{\text{test}}$              |           | 109       |           |          |
| <i>r</i>                       | 0.54      | 0.46      | 0.61      | 0.51     |
| Slope                          | 0.58      | 0.66      | 0.85      | 0.48     |
| RMSE                           | 0.38      | 0.51      | 0.43      | 0.32     |
| <i>SSe</i>                     | 15.2      | 28.4      | 20.0      | 11.0     |
| AIC                            | 298.4     | 368.6     | 332.7     | 268.9    |
| <i>L</i>                       | 4.05E-07  | 2.33E-22  | 1.41E-14  | 1        |

113

114 Table S6. Table of statistical parameters utilized to derive the Akaike Information Criterion (AIC) for  
115 Mediterranean rural environment and amazon basin, Cyprus and Manacapuru. Model and equation numbers  
116 correspond to those in the main text (see Section 3).  $N_{\text{train}}$  represents the sample size of training set, and  $N_{\text{test}}$  for the  
117 testing set (Table 1).  $X$  denotes the counts for coefficient numbers. The correlation coefficient ( $r$ ), slope, root mean  
118 square error (RMSE) and sum of squared error ( $SSe$ ) were calculated based on a robust linear fit between the  
119 predicted and measured  $J_5$  using the training set in logarithmic scale. AIC is calculated as  $AIC = 2X + N_{\text{test}} \ln(SSe)$ .  
120 The relative likelihood term  $L$  ( $L = e^{(AIC_{\text{min}} - AIC_i)/2}$ ) indicates the likelihood of the  $i$ th model minimizing information  
121 loss. For example, in Manacapuru, model 1 (Eq. 2) is approximately 4.6E-07 times more probable than model 4  
122 (Eq. 5) in minimizing the information loss.

### Rural

|                        |   |       |   |   |
|------------------------|---|-------|---|---|
| Total Training dataset |   |       |   |   |
| number                 |   | 10294 |   |   |
| Model number           | 1 | 2     | 3 | 4 |
| $X$                    | 1 | 2     | 3 | 4 |
| <b>Cyprus</b>          |   |       |   |   |
| $N_{\text{train}}$     |   | 140   |   |   |
| $N_{\text{test}}$      |   | 34    |   |   |

|                           |          |          |          |      |
|---------------------------|----------|----------|----------|------|
| <i>r</i>                  | 0.42     | 0.49     | 0.38     | 0.37 |
| Slope                     | 0.35     | 0.48     | 0.37     | 0.17 |
| RMSE                      | 0.58     | 0.66     | 0.70     | 0.35 |
| <i>SSe</i>                | 10.9     | 13.9     | 15.5     | 3.9  |
| AIC                       | 83.2     | 93.4     | 99.2     | 54.0 |
| <i>L</i>                  | 4.6E-07  | 2.78E-09 | 1.55E-10 | 1    |
| <b>Manacapuru</b>         |          |          |          |      |
| <i>N</i> <sub>train</sub> |          | 140      |          |      |
| <i>N</i> <sub>test</sub>  |          | 40       |          |      |
| <i>r</i>                  | 0.04     | 0.19     | 0.21     | 0.46 |
| Slope                     | 0.04     | 0.15     | 0.18     | 0.24 |
| RMSE                      | 0.46     | 0.45     | 0.47     | 0.26 |
| <i>SSe</i>                | 7.9      | 7.8      | 8.4      | 2.5  |
| AIC                       | 84.9     | 86.2     | 91.3     | 45.2 |
| <i>L</i>                  | 2.39E-09 | 1.26E-09 | 9.88E-11 | 1    |

123

124 Table S7. Information of the 14 global sites and the corresponding PNSD measurements, in alphabetic order. All  
125 the data are from the year 2018. The main instruments included differential mobility particle sizer (DMPS),  
126 scanning mobility particle sizer (SMPS), and tandem scanning mobility particle sizer (T-SMPS).

|   | <b>Site</b>  | <b>Environment</b>        | <b>Instrument</b> | <b>Size range (nm)</b> | <b>Measurement altitude (m)</b> | <b>Time resolution</b> | <b>Reference</b>        |
|---|--------------|---------------------------|-------------------|------------------------|---------------------------------|------------------------|-------------------------|
| 1 | Birkenes     | Rural                     | DMPS              | 10-800                 | 220                             | 357 sec                | Yttri et al., 2021      |
| 2 | Hyytiälä     | Rural, boreal forest      | DMPS              | 3-1000                 | 179                             | 10 min                 | Hari and Kulmala, 2005  |
| 3 | K-pusztá     | Rural regional background | DMPS              | 6-800                  | 125                             | 10 min                 | Salma et al., 2016      |
| 4 | La Reunion   | Coastal                   | DMPS              | 10-600                 | 2160                            | 6 min                  | Foucart et al., 2018    |
| 5 | Melpitz      | Rural regional background | T-SMPS            | 5-800                  | 87                              | 20 min                 | Sun et al., 2024        |
| 6 | Montseny     | Urban regional background | SMPS              | 9-855                  | 720                             | 5 min                  | Minguillón et al., 2015 |
| 7 | Mount Cimone | High mountain             | SMPS              | 8-840                  | 2165                            | 357 sec                | Brattich et al., 2020   |
| 8 | Pallas       | Arctic remote             | DMPS              | 7-500                  | 565                             | 5 min                  | Aalto et al., 2002      |

|    |             |                                             |      |        |      |        |                        |
|----|-------------|---------------------------------------------|------|--------|------|--------|------------------------|
| 9  | Storm Peak  | High mountain (limited vegetation coverage) | SMPS | 8-333  | 3220 | 5 min  | Borys and Wetzel, 1997 |
| 10 | Trollhaugen | Antarctic                                   | DMPS | 10-800 | 1309 | 6 min  | Hansen et al., 2009    |
| 11 | Utö         | Coastal                                     | DMPS | 7-500  | 7    | 10 min | Engler et al., 2007    |
| 12 | Värriö      | Arctic remote                               | DMPS | 3-700  | 390  | 10 min | Aalto et al., 2002     |
| 13 | Waldhof     | Rural regional background                   | SMPS | 10-800 | 74   | 5 min  | Sun et al., 2024       |
| 14 | Zeppelin    | Polar                                       | DMPS | 5-710  | 473  | 20 min | Aalto et al., 2002     |

## 128 **References**

- 129 Bergman, T., Makkonen, R., Schrödner, R., Swietlicki, E., Phillips, V. T. J., Le Sager, P., and van Noije, T.:  
130 Description and evaluation of a secondary organic aerosol and new particle formation scheme within tm5-  
131 mp v1.2. *Geoscientific Model Development*, 15(2), 683–713, 2022.
- 132 Guenther, A. B., Jiang, X., Heald, C. L., Sakulyanontvittaya, T., Duhl, T., Emmons, L. K., and Wang, X.: The  
133 Model of Emissions of Gases and Aerosols from Nature version 2.1 (MEGAN2.1): an extended and  
134 updated framework for modeling biogenic emissions, *Geosci. Model Dev.*, 5, 1471–1492,  
135 <https://doi.org/10.5194/gmd-5-1471-2012>, 2012.
- 136 Hersbach, H., Bell, B., Berrisford, P., Hirahara, S., Horányi, A., Muñoz-Sabater, J., Nicolas, J., Peubey, C., Radu,  
137 R., Schepers, D., Simmons, A., Soci, C., Abdalla, S., Abellan, X., Balsamo, G., Bechtold, P., Biavati, G.,  
138 Bidlot, J., Bonavita, M., De Chiara, G., Dahlgren, P., Dee, D., Diamantakis, M., Dragani, R., Flemming,  
139 J., Forbes, R., Fuentes, M., Geer, A., Haimberger, L., Healy, S., Hogan, R. J., Hólm, E., Janisková, M.,  
140 Keeley, S., Laloyaux, P., Lopez, P., Lupu, C., Radnoti, G., de Rosnay, P., Rozum, I., Vamborg, F.,  
141 Villaume, S., and Thépaut, J.-N.: The ERA5 global reanalysis. *Quarterly Journal of the Royal*  
142 *Meteorological Society*, 146, 1999–2049, 2020.
- 143 Kerminen, V.-M. and Kulmala, M.: Analytical formulae connecting the "real" and the "apparent" nucleation rate  
144 and the nuclei number concentration for atmospheric nucleation events, *J. Aerosol Sci.*, 33, 609–622, 2002.
- 145 Riccobono, F., Schobesberger, S., Scott, C. E., Dommen, J., Ortega, I. K., Rondo, L., Almeida, J., Amorim, A.,  
146 Bianchi, F., Breitenlechner, M., David, A., Downard, A., Dunne, E. M., Duplissy, J., Ehrhart, S., Flagan,  
147 R. C., Franchin, A., Hansel, A., Junninen, H., Kajos, M., Keskinen, H., Kupc, A., Kürten, A., Kvashin, A.  
148 N., Laaksonen, A., Lehtipalo, K., Makhmutov, V., Mathot, S., Nieminen, T., Onnela, A., Petäjä, T.,  
149 Praplan, A. P., Santos, F. D., Schallhart, S., Seinfeld, J. H., Sipilä, M., Spracklen, D. V., Stozhkov, Y.,  
150 Stratmann, F., Tomé, A., Tsagkogeorgas, G., Vaattovaara, P., Viisanen, Y., Vrtala, A., Wagner, P. E.,  
151 Weingartner, E., Wex, H., Wimmer, D., Carslaw, K. S., Curtius, J., Donahue, N. M., Kirkby, J., Kulmala,  
152 M., Worsnop, D. R., and Baltensperger, U.: Oxidation Products of Biogenic Emissions Contribute to  
153 Nucleation of Atmospheric Particles, *Science*, 344, 717–721, <https://doi.org/10.1126/science.1243527>,  
154 2014.
- 155 Sindelarova, K., Granier, C., Bouarar, I., Guenther, A., Tilmes, S., Stavrou, T., Müller, J.-F., Kuhn, U., Stefani,  
156 P., and Knorr, W.: Global data set of biogenic voc emissions calculated by the megan model over the last  
157 30 years. *Atmospheric Chemistry and Physics*, 14(17), 9317–9341, 2014.
- 158 van Marle, M. J., Kloster, S., Magi, B. I., Marlon, J. R., Daniau, A. L., Field, R. D., Arneth, A., Forrest, M.,  
159 Hantson, S., Kehrwald, N. M., Knorr, W., Lasslop, G., Li, F., Mangeon, S., Yue, C., Kaiser, J. W., and  
160 Van Der Werf, G. R.: Historic global biomass burning emissions for CMIP6 (BB4CMIP) based on merging  
161 satellite observations with proxies and fire models (1750–2015). *Geoscientific Model Development*, 10(9),  
162 3329–3357, 2017.
- 163 van Noije, T., Bergman, T., Le Sager, P., O'Donnell, D., Makkonen, R., Gonçalves-Ageitos, M., Döscher, R.,  
164 Fladrich, U., von Hardenberg, J., Keskinen, J.-P., Korhonen, H., Laakso, A., Myriokefalitakis, S., Ollinaho,  
165 P., Pérez García-Pando, C., Reerink, T., Schrödner, R., Wyser, K., and Yang, S.: EC-Earth3-AerChem: a  
166 global climate model with interactive aerosols and atmospheric chemistry participating in CMIP6.  
167 *Geoscientific Model Development*, 14(9), 5637–5668, 2021.

- 168 Vehkamäki, H., Kulmala, M., Napari, I., Lehtinen, K. E. J., Timmreck, C., Noppel, M., and Laaksonen, A.: An  
169 improved parameterization for sulfuric acid/water nucleation rates for tropospheric and stratospheric  
170 conditions. *J. Geophys. Res.*, 107, 4622–4631, 2002.
- 171 Vignati, E., Wilson, J., and Stier, P.: M7: An efficient size-resolved aerosol microphysics module for large-scale  
172 aerosol transport models. *Journal of Geophysical Research D: Atmospheres*, 109(22), 1–17, 2004.
- 173 Williams, J. E., Folkert Boersma, K., Le Sager, P., and Verstraeten, W. W.: The high-resolution version of TM5-  
174 MP for optimized satellite retrievals: Description and validation. *Geoscientific Model Development*, 10(2),  
175 721–750, 2017.
- 176
